# Supplementary material
Source: publisher figshare collection journal article supplement (https://acs.figshare.com/ndownloader/files/4195618)
Supplement: Supplementary file 1 [file 4195618]

## **Supporting Information:**

### **A Steady-State Biofilm Model for Simultaneous Reduction of Nitrate and Perchlorate --**

#### **Part 1: Model Development and Numerical Solution**

Youneng Tang<sup>†</sup>, Heping Zhao<sup>†</sup>, Andrew K. Marcus<sup>†</sup>, Bruce, E. Rittmann,<sup>†,\*</sup>

<sup>†</sup> Swette Center for Environmental Biotechnology, Biodesign Institute at Arizona State University,  
1001 South McAllister Ave., Tempe, AZ 85287-5701, USA

\* Corresponding author. Email: Rittmann@asu.edu; tel.: +1 480 727 0434; fax: +1 480 727

0889

This supporting information contains four pages.

A steady-state mass balance for solid-component  $i$  can be written for a differential volume element  $A' dz$  of the biofilm,

$$A' dz \mu_{oi(z)} X_f f_{i(z)} = A' J_{Xi(z+dz)} - A' J_{Xi(z)} \quad (i = 1, 2, 3, 4, 5) \quad [\text{S1}]$$

In Equation S1,  $A'$  is the biofilm volume element's lateral area for mass transport ( $L^2$ ), and  $J_{x(z)}$  and  $J_{x(z+dz)}$  are the flux of solid-component  $i$  through area  $A'$  at the points  $z$  and  $(z + dz)$  in the biofilm. The sum of the volume fraction of every solid-component must equal 1.

$$\sum_{i=1}^{i=5} f_i = 1 \quad [\text{S2}]$$

Equation S1 divided by  $A' dz X_f$  yields

$$\mu_{oi(z)} f_{i(z)} = \frac{1}{X_f} \frac{J_{Xi(z+dz)} - J_{Xi(z)}}{dz} \quad (i = 1, 2, 3, 4, 5) \quad [\text{S3}]$$

which for  $dz$  approaching 0 leads to

$$\mu_{oi(z)} f_{i(z)} = \frac{1}{X_f} \frac{\partial J_{Xi(z)}}{\partial z} \quad (i = 1, 2, 3, 4, 5) \quad [\text{S4}]$$

The biomass flux can be expressed by the velocity  $u$  at which the biomass moves with respect to the support medium multiplied by the concentration  $X_f f_i$  of the solid component.

$$J_{Xi(z)} = u_{(z)} X_f f_{i(z)} \quad (i = 1, 2, 3, 4, 5) \quad [\text{S5}]$$

Using Equation S5, Equation S4 can be rewritten as:

$$\begin{aligned} \mu_{oi(z)} f_{i(z)} &= \frac{1}{X_f} \frac{\partial(u_{(z)} X_f f_{i(z)})}{\partial z} = \frac{\partial(u_{(z)} f_{i(z)})}{\partial z} \\ &\stackrel{\text{chain rule}}{=} f_{i(z)} \frac{\partial u_{(z)}}{\partial z} + u_{(z)} \frac{\partial f_{i(z)}}{\partial z} \quad (i = 1, 2, 3, 4, 5) \end{aligned} \quad [\text{S6}]$$

The average observed specific growth rate of all solid components at a location  $z$  in the biofilm is defined as

$$\overline{\mu_{o(z)}} = \sum_{i=1}^{i=5} (\mu_{oi(z)} f_{i(z)}) \quad [\text{S7}]$$

which can be converted to

$$\begin{aligned} \overline{\mu_{o(z)}} &= \sum_{i=1}^{i=5} (\mu_{oi(z)} f_{i(z)}) \\ &= \sum_{i=1}^{i=5} \left( \frac{1}{X_f} \frac{\partial J_{Xi(z)}}{\partial z} \right) \text{ (obtained from equation S4)} \\ &= \frac{1}{X_f} \frac{\partial \sum_{i=1}^{i=5} (J_{Xi(z)})}{\partial z} \\ &= \frac{1}{X_f} \frac{\partial \sum_{i=1}^{i=5} (u_{(z)} X_f f_{i(z)})}{\partial z} \text{ (obtained from equation S5)} \\ &= \frac{\partial \sum_{i=1}^{i=5} (u_{(z)} f_{i(z)})}{\partial z} = \frac{\partial (u_{(z)} \times \sum_{i=1}^{i=5} f_{i(z)})}{\partial z} \\ &= \frac{\partial u_{(z)}}{\partial z} \text{ (obtained from equation 10)} \quad (i = 1, 2, 3, 4, 5) \end{aligned} \quad [\text{S8}]$$

Substituting Equation S8 into Equation S6 gives

$$\begin{aligned} \mu_{oi(z)} f_{i(z)} &= f_{i(z)} \frac{\partial u_{(z)}}{\partial z} + u_{(z)} \frac{\partial f_{i(z)}}{\partial z} = f_{i(z)} \overline{\mu_{o(z)}} + u_{(z)} \frac{\partial f_{i(z)}}{\partial z} \\ \text{or} \\ (\mu_{oi(z)} - \overline{\mu_{o(z)}}) f_{i(z)} - u_{(z)} \frac{\partial f_{i(z)}}{\partial z} &= 0 \\ \text{or} \\ \frac{\partial f_{i(z)}}{\partial z} &= \frac{(\mu_{oi(z)} - \overline{\mu_{o(z)}}) f_{i(z)}}{u_{(z)}} \quad (i = 1, 2, 3, 4, 5) \end{aligned} \quad [\text{S9}]$$

The physical meaning of Equation S9 is that the fraction variation of a solid component at the

position  $z$  ( $\frac{\partial f_{i(z)}}{\partial z}$ ) is in direct proportion to the difference between the specific growth rate of this solid component and the average specific growth rate of all solid components at the position  $z$  ( $(\mu_{oi(z)} - \overline{\mu_{o(z)}})$ ) and the fraction of this solid component at the position  $z$  ( $f_{i(z)}$ ), but it is in inverse proportion to the velocity at which the biomass moves in respect to the support media ( $u_{(z)}$ ).

The  $u_{(z)}$  term in Equation S9 can be calculated using Equation S5

$$\begin{aligned}
 u_{(z)} &= \frac{J_{Xi(z)}}{X_f f_{i(z)}} = \frac{f_{i(z)} \int_{L_f}^z (\text{net growth rate of all species}) dz}{X_f f_{i(z)}} \\
 &= \frac{\int_{L_f}^z (\text{net growth rate of all species}) dz}{X_f} \\
 &= \frac{\int_{L_f}^z (\sum_{i=1}^{i=5} \mu_{oi} f_i X_f) dz}{X_f} = \int_{L_f}^z (\sum_{i=1}^{i=5} \mu_{oi} f_i) dz
 \end{aligned} \tag{S10}$$

Substitution of Equations S7 and S10 into Equation S9 provides the final form of the mass balance for solid component  $i$ ,

$$\left( \int_{L_f}^z (\sum_{i=1}^{i=5} \mu_{oi} f_i) dz \right) \frac{\partial f_{i(z)}}{\partial z} = (\mu_{oi(z)} - \sum_{i=1}^{i=5} (\mu_{oi(z)} f_{i(z)})) f_{i(z)} \quad (i = 1, 2, 3, 4, 5) \tag{S11}$$
